# Supplementary material
Source: publisher figshare collection journal article supplement (https://frontiersin.figshare.com/ndownloader/files/21529845)
Supplement: Supplementary file [file 21529845]

Supplemental Figure 1: LOD profiles for chromosomes 1 and 3 containing major QTL included in the final multiple interval mapping model of data combined over all three environments

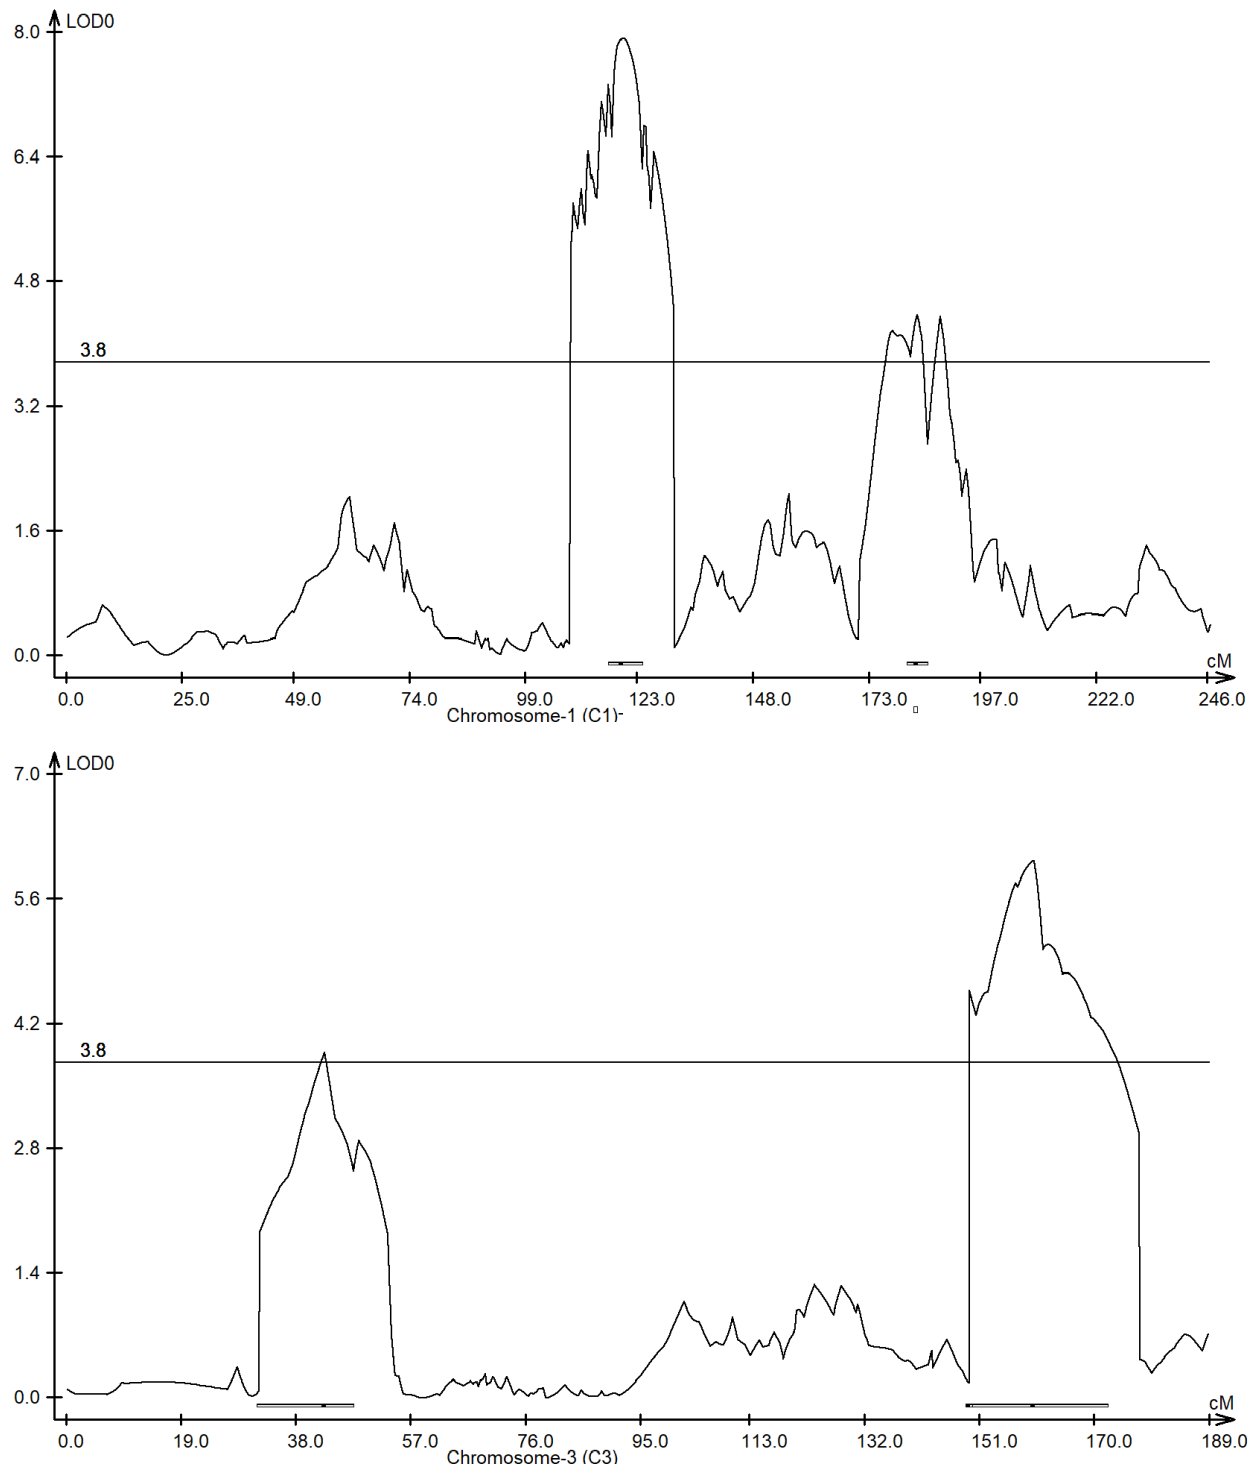

The LOD (y-axis) is a measure of the likelihood of a QTL being present at each test position along the chromosome (x-axis). The horizontal line across the figure is the LOD threshold. The x-axis has markers (not shown) mapped along its axis and is measured in centiMorgans (cM).
